# Supplementary material
Source: publisher site journal article supplement (http://www.kjim.org/upload/media/kjim-2018-465-suppl.pdf)
Supplement: Supplementary file 1 [file kjim-2018-465-suppl.pdf]

**Supplementary Table 1. Search strategy**

| Database | Search keywords                                                                                                                                                                                                                                                                                                                                                                                                                                                                                                                                                                                                                                                 |
|----------|-----------------------------------------------------------------------------------------------------------------------------------------------------------------------------------------------------------------------------------------------------------------------------------------------------------------------------------------------------------------------------------------------------------------------------------------------------------------------------------------------------------------------------------------------------------------------------------------------------------------------------------------------------------------|
| PubMed   | <p>MEDLINE</p> <ol style="list-style-type: none"> <li>1. “Tenofovir”[MH] OR “antiviral”[ALL] OR “Viread”</li> <li>2. “Pregnancy”[MH] OR “Gravidity”[MH] OR “Pregnant”[ALL] OR “Mothers”[MH] OR “Maternal”[ALL] OR “Infectious disease transmission, vertical”[MH] OR “mother to child transmission”[ALL]</li> <li>3. #1 AND #2</li> <li>4. “Hepatitis b virus”[MH] OR “hepatitis B”[MH] OR “HBV”[ALL]</li> <li>5. #3 AND #4</li> <li>6. “humans”[MH]</li> <li>7. #5 AND #6</li> </ol> <p>MH, MeSH terms; ALL, All fields.<br/>           Limitation: humans<br/>           Date of Search: Jul. 15, 2018<br/>           Results: 433 articles were searched</p> |
| EMBASE   | <p>EMBASE</p> <ol style="list-style-type: none"> <li>1. ‘Tenofovir’/exp OR ‘antiviral agent’/exp OR ‘viread’/exp</li> <li>2. ‘Pregnant woman’/exp OR ‘pregnancy’/exp OR ‘adult to child transmission’ OR ‘mother to child transmission’/exp OR ‘Vertical transmission’/exp</li> <li>3. #1 AND #2</li> <li>4. ‘Chronic hepatitis B’/exp OR ‘hepatitis B virus’ OR ‘HBV’/exp OR ‘CHB’</li> <li>5. #3 AND #4</li> <li>6. #5 AND [humans]/lim</li> </ol> <p>Exp, explosion search; lim, limitation.<br/>           Limitation: humans<br/>           Date of Search: Jul. 15, 2018<br/>           Results: 1,125 articles were searched</p>                         |
| Cochrane | <p>The Cochrane Library</p> <ol style="list-style-type: none"> <li>1. (Tenofovir) OR (Viread) OR (Antiviral agent)</li> <li>2. (Pregnant woman) OR (pregnancy) OR (gravidity) OR (mother to child transmission) OR (Vertical transmission)</li> <li>3. #1 AND #2</li> <li>4. (Hepatitis B) OR (Chronic hepatitis B) OR (HBV)</li> <li>5. #3 AND #4</li> </ol> <p>All field text searched.<br/>           Date of Search: Jul. 15, 2018<br/>           67 Articles were searched.</p>                                                                                                                                                                            |
